# Supplementary material
Source: PubMed Central journal article supplement (PMC4075514)
Supplement: rna-11-298-s01.pdf [file rna-11-298-s01.pdf]

## **Supplemental Material to:**

**Sina Mozaffari-Jovin, Traudy Wandersleben,  
Karine F Santos, Cindy L Will, Reinhard Lührmann,  
and Markus C Wahl**

**Novel regulatory principles of the spliceosomal Brr2  
RNA helicase and links to retinal disease in humans**

**2014; 11(4)**

**<http://dx.doi.org/10.4161/rna.28353>**

**[www.landesbioscience.com/journals/rnabiology/article/28353/](http://www.landesbioscience.com/journals/rnabiology/article/28353/)**

**1. 2013RNABIOL0198-Mov1.mp4**

## Supplemental Material

**Movie S1.** Conformational changes in hBrr2HR upon hPrp8Jab1 binding and further conformational differences between human and yeast Brr2HR-Prp8Jab1 complexes, which correlate with the removal of the Prp8Jab1 C-terminal tail from the Brr2HR RNA-binding tunnel. The video was generated by morphing the structure coordinates of hBrr2HR (PDB ID 4F91) into the coordinates in complex with hPrp8Jab1 and by morphing the coordinates of hBrr2HR-hPrp8Jab1 (PDB ID 4KIT) into the coordinates of hBrr2HR-hPrp8Jab1 (PDB ID 4BGD).
